# Supplementary material for: Health Self-Efficacy Among Populations with Multiple Chronic Conditions: the Value of Patient-Centered Communication
Source: PubMed Central journal article supplement — Adv Ther. 2016 Jun 29;33(8):1440–51. doi: 10.1007/s12325-016-0369-7 (PMC4969324; doi:10.1007/s12325-016-0369-7), 2016-06-29
Supplement: 12325_2016_369_MOESM1_ESM.pdf [file 12325_2016_369_MOESM1_ESM.pdf]

**SUPPLEMENTARY MATERIAL**

Appendix 1. Supplement to Table 3: Multivariable Linear Regression Examining Independent associations of Sociodemographic Variables, Healthcare Variables, Number of Chronic Conditions, Depression/Anxiety, and Patient-Centered Communication with Predictors with Health Self-Efficacy

|                          | beta  | SE   | p-value | Type III p-value |
|--------------------------|-------|------|---------|------------------|
| Sex                      |       |      |         |                  |
| Male                     | 0.18  | 1.30 | 0.90    | -                |
| Female                   | -     |      |         |                  |
| Age                      |       |      |         | 0.87             |
| 18-49                    | -0.80 | 1.99 | 0.69    |                  |
| 50-64                    | -0.64 | 1.39 | 0.65    |                  |
| 65+                      | -     |      |         |                  |
| Race/Ethnicity           |       |      |         | 0.27             |
| NH, White                | 2.31  | 2.67 | 0.39    |                  |
| NH, Black                | 4.88  | 2.78 | 0.09    |                  |
| NH, Other                | 0.07  | 4.66 | 0.99    |                  |
| Hispanic                 | -     |      |         |                  |
| Education                |       |      |         | 0.62             |
| High school or less      | -0.48 | 2.07 | 0.82    |                  |
| Some college             | -1.53 | 1.56 | 0.33    |                  |
| College graduate or more | -     |      |         |                  |
| Income                   |       |      |         | 0.03             |
| < \$20,000               | -8.30 | 3.34 | 0.02    |                  |
| \$20,000 -\$49,999       | -3.22 | 2.17 | 0.14    |                  |
| \$50,000 -\$99,999       | -0.28 | 1.84 | 0.88    |                  |
| \$100,000 or more        | -     |      |         |                  |

|                                     |       |      |      |      |
|-------------------------------------|-------|------|------|------|
| Marital Status                      |       |      |      | 0.50 |
| Married / living as married         | 1.56  | 1.86 | 0.41 |      |
| Single, never been married          | 3.26  | 2.78 | 0.25 |      |
| Divorced /widowed /separated        | -     |      |      |      |
| Born in U.S                         |       |      |      |      |
| Yes                                 | -     |      |      | -    |
| No                                  | 0.61  | 2.69 | 0.82 |      |
| Rural/Urban (USDA)                  |       |      |      | 0.44 |
| County in Metro                     | -2.65 | 2.25 | 0.24 |      |
| Nonmetro (population $\geq$ 20,000) | -1.61 | 3.87 | 0.68 |      |
| Nonmetro (population <20,000)       | -     |      |      |      |
| Regular Healthcare Provider         |       |      |      |      |
| Yes                                 | -3.05 | 1.92 | 0.12 | -    |
| No                                  | -     |      |      |      |
| Health Insurance Status             |       |      |      |      |
| Insured                             | 3.46  | 1.98 | 0.09 | -    |
| Not Insured                         | -     |      |      |      |
| Number of Healthcare Visits         |       |      |      |      |
| 1-2                                 | 1.57  | 1.87 | 0.41 | 0.57 |
|                                     | 2.01  | 1.91 | 0.30 |      |

|                                |     |       |      |        |        |
|--------------------------------|-----|-------|------|--------|--------|
|                                | 3-4 | -     |      |        |        |
|                                | 5+  |       |      |        |        |
| Number of Chronic Conditions   |     |       |      |        | <.0001 |
|                                | 0   | 11.06 | 2.42 | <.0001 |        |
|                                | 1   | 7.82  | 1.96 | .0002  |        |
|                                | 2   | 0.69  | 2.06 | 0.74   |        |
|                                | 3+  | -     |      |        |        |
| Depression/Anxiety             |     |       |      |        | 0.01   |
|                                | Yes | -     |      |        |        |
|                                | No  | 4.34  | 1.69 | 0.01   | -      |
| Patient Centered Communication |     | 0.26  | 0.04 | <.0001 |        |





|                                   |       |      |        |      |       |      |        |      |       |      |       |      |       |      |        |      |
|-----------------------------------|-------|------|--------|------|-------|------|--------|------|-------|------|-------|------|-------|------|--------|------|
| Regular<br>Healthcare<br>Provider | -5.86 | 2.46 | 0.02   |      | -3.93 | 3.52 | 0.27   |      | 11.14 | 6.53 | 0.09  |      | -2.33 | 6.45 | 0.72   |      |
| Yes                               | -     |      |        |      |       |      |        |      |       |      |       |      |       |      |        |      |
| No                                |       |      |        |      |       |      |        |      |       |      |       |      |       |      |        |      |
| Health Insurance                  |       |      |        |      |       |      |        |      |       |      |       |      |       |      |        |      |
| Yes                               | 4.97  | 2.77 | 0.08   |      | 4.52  | 4.16 | 0.28   |      | 1.64  | 6.80 | 0.81  |      | -4.41 | 6.52 | 0.50   |      |
| No                                | -     |      |        |      |       |      |        |      |       |      |       |      |       |      |        |      |
| Number of<br>Healthcare Visits    |       |      |        | 0.43 |       |      |        | 0.37 |       |      |       | 0.34 |       |      |        | 0.62 |
| 1-2                               | 2.94  | 4.41 | 0.51   |      | 3.83  | 2.95 | 0.20   |      | 4.94  | 3.81 | 0.20  |      | -1.99 | 3.88 | 0.61   |      |
| 3-4                               | 5.40  | 4.51 | 0.24   |      | 0.83  | 2.79 | 0.77   |      | 2.75  | 4.48 | 0.54  |      | 1.61  | 3.12 | 0.61   |      |
| 5+                                | -     |      |        |      |       |      |        |      |       |      |       |      |       |      |        |      |
| PCC1                              | 0.21  | 0.06 | 0.0005 |      | 0.26  | 0.05 | <.0001 |      | 0.34  | 0.10 | 0.002 |      | 0.35  | 0.08 | <.0001 |      |



|                                     |       |      |      |      |       |      |      |      |
|-------------------------------------|-------|------|------|------|-------|------|------|------|
| \$49,999                            | -3.52 | 2.49 | 0.16 |      | -3.88 | 4.52 | 0.39 |      |
| \$50,000 -<br>\$99,999              | -1.44 | 1.98 | 0.47 |      | -0.43 | 4.16 | 0.92 |      |
| \$100,000 or<br>more                |       |      |      |      |       |      |      |      |
| Marital Status                      |       |      |      | 0.71 |       |      |      | 0.48 |
| Married /<br>living as<br>married   | 1.19  | 1.97 | 0.55 |      | 1.15  | 4.01 | 0.77 |      |
| Single, never<br>been married       | 2.55  | 3.19 | 0.43 |      | 5.42  | 4.92 | 0.23 |      |
| Divorced<br>/widowed<br>/separated  |       |      |      |      |       |      |      |      |
| Born in U.S                         |       |      |      |      |       |      |      |      |
| Yes                                 |       |      |      |      |       |      |      |      |
| No                                  | -1.09 | 2.92 | 0.71 |      | 9.91  | 5.05 | 0.06 |      |
| Rural/Urban<br>(USDA)               |       |      |      | 0.49 |       |      |      | 0.40 |
| County in<br>Metro                  | -1.96 | 2.51 | 0.44 |      | -3.13 | 4.40 | 0.48 |      |
| Nonmetro<br>(population<br>≥20,000) | 0.73  | 4.65 | 0.88 |      | -7.09 | 5.17 | 0.18 |      |
| Nonmetro<br>(population<br><20,000) |       |      |      |      |       |      |      |      |
| Regular<br>Healthcare<br>Provider   |       |      |      |      |       |      |      |      |
| Yes                                 |       |      |      |      |       |      |      |      |
| No                                  | -5.15 | 2.08 | 0.02 |      | -0.03 | 4.26 | 0.99 |      |



|                             |      |      |        |      |       |      |        |      |
|-----------------------------|------|------|--------|------|-------|------|--------|------|
|                             |      |      |        |      |       |      |        |      |
| Health Insurance            |      |      |        |      |       |      |        |      |
| Yes                         | 5.41 | 2.69 | 0.05   |      | -0.72 | 4.15 | 0.86   |      |
| No                          |      |      |        |      |       |      |        |      |
| Number of Healthcare Visits |      |      |        | 0.13 |       |      |        | 0.40 |
| 1-2                         |      |      |        |      |       |      |        |      |
| 3-4                         | 4.31 | 2.17 | 0.05   |      | 1.70  | 3.40 | 0.62   |      |
| 5+                          | 2.01 | 2.08 | 0.34   |      | 5.01  | 3.95 | 0.21   |      |
| PCC1                        | 0.19 | 0.04 | <.0001 |      | 0.39  | 0.09 | <.0001 |      |
